# Supplementary material for: Toward a scientific understanding of the effectiveness, material basis and prescription compatibility of a Chinese herbal formula Dan-hong injection
Source: PubMed Central journal article supplement (PMC5385876; doi:10.1038/srep46266), 2017-04-10
Supplement: srep46266-s1.pdf [file srep46266-s1.pdf]

## **Supplementary Information**

**Manuscript title:**

**Toward a scientific understanding of the effectiveness, material basis and prescription compatibility of a Chinese herbal formula Dan-hong injection**

**Authors:**

Panlin Li, Weiwei Su, Sha Yun, Yiqiu Liao, Yinyin Liao, Hong Liu, Peibo Li, Yonggang Wang, Wei Peng, Hongliang Yang

Guangdong Engineering and Technology Research Center for Quality and Efficacy Re-evaluation of Post-marketed TCM, Guangdong Key Laboratory of Plant Resources, School of Life Sciences, Sun Yat-sen University, Guangzhou 510275, P.R. China

Correspondence and requests for materials should be addressed to H.L.Y. (email: yaohliang@mail.sysu.edu.cn)

**Supplementary Table S1. Identification of the chemical constituents of DHI by UFLC-PDA-Triple TOF-MS/MS.**

| NO | Formula                                                       | T <sub>R</sub><br>(min) | [M+H] <sup>+</sup><br>(error) | [M-H] <sup>-</sup><br>(error) | Fragment ions in positive (+) ion mode <sup>a</sup>                                                                                                                                                                                                                   | Fragment ions in negative (-) ion mode                                                                                                                          | Identification              | Attribution |
|----|---------------------------------------------------------------|-------------------------|-------------------------------|-------------------------------|-----------------------------------------------------------------------------------------------------------------------------------------------------------------------------------------------------------------------------------------------------------------------|-----------------------------------------------------------------------------------------------------------------------------------------------------------------|-----------------------------|-------------|
| 1  | C <sub>5</sub> H <sub>9</sub> NO <sub>2</sub>                 | 0.90                    | 116.0706<br>(-0.3)            | -                             | 70.0673[M+H-HCOOH] <sup>+</sup>                                                                                                                                                                                                                                       | -                                                                                                                                                               | Proline                     | SM/CT       |
| 2  | C <sub>5</sub> H <sub>5</sub> N <sub>5</sub>                  | 1.03                    | 136.0618<br>(0.2)             | 134.0471<br>(-0.9)            | 119.0358[M+H-NH <sub>3</sub> ] <sup>+</sup> , 109.0503, 94.0409,<br>92.0255[M+H-NH <sub>3</sub> -HCN] <sup>+</sup> ,<br>65.0160[M+H-NH <sub>3</sub> -2HCN] <sup>+</sup> , 55.0320                                                                                     | -                                                                                                                                                               | Adenine <sup>b</sup>        | SM/CT       |
| 3  | C <sub>5</sub> H <sub>7</sub> NO <sub>3</sub>                 | 1.23                    | 130.0497<br>(-1.0)            | -                             | 84.0456[M+H-HCOOH] <sup>+</sup> ,<br>56.0527[M+H-HCOOH-CO] <sup>+</sup>                                                                                                                                                                                               | -                                                                                                                                                               | L-Pyroglutamic<br>acid      | SM/CT       |
| 4  | C <sub>9</sub> H <sub>12</sub> N <sub>2</sub> O <sub>6</sub>  | 1.33                    | 245.0769<br>(0.5)             | 243.0622<br>(-0.2)            | 115.0403, 113.0355[M+H-Ribose] <sup>+</sup> ,<br>96.0084[M+H-Ribose-NH <sub>3</sub> ] <sup>+</sup> , 85.0293,<br>70.0314[M+H-Ribose-NH <sub>3</sub> -C <sub>2</sub> H <sub>2</sub> ] <sup>+</sup> , 57.0374                                                           | 200.0584[M-H-NH <sub>3</sub> -C <sub>2</sub> H <sub>2</sub> ] <sup>-</sup> , 152.0366,<br>140.0363, 110.0264                                                    | Uridine <sup>b</sup>        | SM/CT       |
| 5  | C <sub>4</sub> H <sub>4</sub> N <sub>2</sub> O <sub>2</sub>   | 1.34                    | 113.0349<br>(2.7)             | 111.0206<br>(5.1)             | 96.0102[M+H-NH <sub>3</sub> ] <sup>+</sup> , 95.0234,<br>70.0318[M+H-NH <sub>3</sub> -C <sub>2</sub> H <sub>2</sub> ] <sup>+</sup> ,<br>68.0152[M+H-NH <sub>3</sub> -CO] <sup>+</sup> ,<br>53.0057[M+H-2NH <sub>3</sub> -C <sub>2</sub> H <sub>2</sub> ] <sup>+</sup> | -                                                                                                                                                               | Uracil <sup>b</sup>         | SM/CT       |
| 6  | C <sub>4</sub> H <sub>6</sub> O <sub>4</sub>                  | 1.38                    | -                             | 117.0212<br>(6.2)             | -                                                                                                                                                                                                                                                                     | 99.0109[M-H-H <sub>2</sub> O] <sup>-</sup> , 73.0317[M-H-CO <sub>2</sub> ] <sup>-</sup> ,<br>55.0219[M-H-CO <sub>2</sub> -H <sub>2</sub> O] <sup>-</sup>        | Succinic acid <sup>b</sup>  | SM/CT       |
| 7  | C <sub>6</sub> H <sub>13</sub> NO <sub>2</sub>                | 1.38                    | 132.1017<br>(-1.8)            | -                             | 86.0975[M+H-HCOOH] <sup>+</sup> ,<br>69.0718[M+H-HCOOH-NH <sub>3</sub> ] <sup>+</sup> , 57.0605, 56.0525                                                                                                                                                              | -                                                                                                                                                               | Isoleucine <sup>b</sup>     | SM          |
| 8  | C <sub>6</sub> H <sub>13</sub> NO <sub>2</sub>                | 1.48                    | 132.1018<br>(-0.9)            | -                             | 86.0977[M+H-HCOOH] <sup>+</sup> ,<br>69.0721[M+H-HCOOH-NH <sub>3</sub> ] <sup>+</sup> , 57.0606, 56.0526                                                                                                                                                              | -                                                                                                                                                               | Leucine                     | SM/CT       |
| 9  | C <sub>10</sub> H <sub>13</sub> N <sub>5</sub> O <sub>4</sub> | 1.68                    | 268.1043<br>(1.2)             | 266.0891<br>(-1.3)            | 136.0624[M+H-Ribose] <sup>+</sup> ,<br>119.0358[M+H-Ribose-NH <sub>3</sub> ] <sup>+</sup>                                                                                                                                                                             | 134.0478[M-H-Ribose] <sup>-</sup> , 107.0358                                                                                                                    | Adenosine <sup>b</sup>      | SM/CT       |
| 10 | C <sub>10</sub> H <sub>13</sub> N <sub>5</sub> O <sub>5</sub> | 1.88                    | 284.0985<br>(-1.6)            | 282.0836<br>(-2.7)            | 135.0296[M+H-Ribose-NH <sub>3</sub> ] <sup>+</sup> , 110.0351                                                                                                                                                                                                         | 150.0418[M-H-Ribose] <sup>-</sup> ,<br>133.0155[M-H-Ribose-NH <sub>3</sub> ] <sup>-</sup> , 108.0201                                                            | Guanosine                   | SM/CT       |
| 11 | C <sub>7</sub> H <sub>6</sub> O <sub>5</sub>                  | 1.98                    | -                             | 169.0148<br>(3.2)             | -                                                                                                                                                                                                                                                                     | 125.0252[M-H-CO <sub>2</sub> ] <sup>-</sup> , 124.0150,<br>79.0206[M-H-CO <sub>2</sub> -C <sub>2</sub> H <sub>4</sub> -H <sub>2</sub> O] <sup>-</sup> , 53.0422 | Gallic acid                 | NF          |
| 12 | C <sub>9</sub> H <sub>11</sub> NO <sub>2</sub>                | 2.55                    | 166.0865<br>(1.5)             | 164.0726<br>(5.3)             | 120.0815[M+H-H <sub>2</sub> CO <sub>2</sub> ] <sup>+</sup> ,<br>103.0555[M+H-NH <sub>3</sub> -H <sub>2</sub> CO <sub>2</sub> ] <sup>+</sup> , 91.0557, 77.0408                                                                                                        | 147.0450[M-H-NH <sub>3</sub> ] <sup>-</sup> ,<br>103.0560[M-H-NH <sub>3</sub> -CO <sub>2</sub> ] <sup>-</sup> , 72.0099                                         | Phenylalanine <sup>b</sup>  | SM/CT       |
| 13 | C <sub>6</sub> H <sub>6</sub> O <sub>3</sub>                  | 2.84                    | 127.0390<br>(1.1)             | -                             | 109.0296[M+H-H <sub>2</sub> O] <sup>+</sup> , 81.0353[M+H-CO] <sup>+</sup> ,<br>53.0428[M+H-2CO] <sup>+</sup>                                                                                                                                                         | -                                                                                                                                                               | 5-Hydroxymethyl<br>furfural | SM          |

| NO | Formula                                                       | T <sub>R</sub><br>(min) | [M+H] <sup>+</sup><br>(error) | [M-H] <sup>-</sup><br>(error) | Fragment ions in positive (+) ion mode <sup>a</sup>                                                                                                                                  | Fragment ions in negative (-) ion mode                                                                                                                                                                                             | Identification                                                                                                                                | Attribution |
|----|---------------------------------------------------------------|-------------------------|-------------------------------|-------------------------------|--------------------------------------------------------------------------------------------------------------------------------------------------------------------------------------|------------------------------------------------------------------------------------------------------------------------------------------------------------------------------------------------------------------------------------|-----------------------------------------------------------------------------------------------------------------------------------------------|-------------|
| 14 | C <sub>13</sub> H <sub>16</sub> O <sub>8</sub>                | 2.92                    | 301.0903<br>(-4.8)            | 299.0775<br>(0.8)             | 283.0735[M+H-H <sub>2</sub> O] <sup>+</sup> , 139.0382[M+H-Glc] <sup>+</sup> ,<br>121.0288[M+H-Glc-H <sub>2</sub> O] <sup>+</sup> , 95.0495, 77.0392                                 | 137.0246[M-H-Glc] <sup>-</sup> ,<br>93.0352[M-H-Glc-CO <sub>2</sub> ] <sup>-</sup>                                                                                                                                                 | p-Hydroxybenzoic<br>acid- <i>O</i> -glucoside                                                                                                 | CT          |
| 15 | C <sub>8</sub> H <sub>8</sub> O <sub>4</sub>                  | 3.17                    | 169.0495<br>(-0.1)            | 167.0357<br>(4.3)             | 151.0352[M+H-H <sub>2</sub> O] <sup>+</sup> , 133.0275,<br>123.0417[M+H-CO] <sup>+</sup> , 77.0405                                                                                   | 121.0274[M-H-H <sub>2</sub> O-CO] <sup>-</sup> , 93.0337,<br>65.0398                                                                                                                                                               | 2-Hydroxy-3',4'-dihydroxyacetophenone                                                                                                         | SM          |
| 16 | C <sub>9</sub> H <sub>10</sub> O <sub>5</sub>                 | 3.25                    |                               | 197.0465<br>(2.3)             |                                                                                                                                                                                      | 179.0352[M-H-H <sub>2</sub> O] <sup>-</sup> ,<br>151.0403[M-H-CO <sub>2</sub> ] <sup>-</sup> ,<br>135.0455[M-H-H <sub>2</sub> O-CO <sub>2</sub> ] <sup>-</sup> , 72.9947                                                           | Danshensu <sup>b</sup>                                                                                                                        | SM          |
| 17 | C <sub>7</sub> H <sub>6</sub> O <sub>4</sub>                  | 3.55                    | 155.0339<br>(0.1)             | 153.0201<br>(4.8)             | 137.0227[M+H-H <sub>2</sub> O] <sup>+</sup> , 111.0443[M+H-CO <sub>2</sub> ] <sup>+</sup> ,<br>93.0339[M+H-H <sub>2</sub> O-CO <sub>2</sub> ] <sup>+</sup> , 65.0405                 | 109.0310[M-H-CO <sub>2</sub> ] <sup>-</sup> , 108.0222,<br>91.0188[M-H-H <sub>2</sub> O-CO <sub>2</sub> ] <sup>-</sup> , 65.0053                                                                                                   | Protocatechuic<br>acid <sup>b</sup>                                                                                                           | SM/CT       |
| 18 | C <sub>8</sub> H <sub>8</sub> O <sub>4</sub>                  | 3.64                    |                               | 167.0353<br>(1.6)             |                                                                                                                                                                                      | 123.0466[M-H-CO <sub>2</sub> ] <sup>-</sup> , 93.0345, 65.0401                                                                                                                                                                     | Vanillic acid <sup>b</sup>                                                                                                                    | NF          |
| 19 | C <sub>10</sub> H <sub>12</sub> O <sub>5</sub>                | 4.09                    |                               | 211.0605<br>(-3.3)            |                                                                                                                                                                                      | 167.0347[M-H-CO <sub>2</sub> ] <sup>-</sup> ,<br>149.0598[M-H-H <sub>2</sub> O-CO <sub>2</sub> ] <sup>-</sup> , 123.0447                                                                                                           | Danshensu<br>methyl ester                                                                                                                     | NF          |
| 20 | C <sub>11</sub> H <sub>12</sub> N <sub>2</sub> O <sub>2</sub> | 4.38                    | 205.0972<br>(0.2)             | 203.0826<br>(-0.2)            | 188.0700[M+H-NH <sub>3</sub> ] <sup>+</sup> ,<br>170.0593[M+H-NH <sub>3</sub> -H <sub>2</sub> O] <sup>+</sup> ,<br>159.0911[M+H-HCOOH] <sup>+</sup> , 146.0599, 118.0650,<br>91.0550 | 159.0904[M-H-CO <sub>2</sub> ] <sup>-</sup> ,<br>142.0641[M-H-CO <sub>2</sub> -NH <sub>3</sub> ] <sup>-</sup> , 130.0652,<br>116.0499[M-H-CO <sub>2</sub> -NH <sub>3</sub> -C <sub>2</sub> H <sub>2</sub> ] <sup>-</sup> , 74.0243 | Tryptophane <sup>b</sup>                                                                                                                      | SM/CT       |
| 21 | C <sub>9</sub> H <sub>10</sub> O <sub>4</sub>                 | 4.58                    |                               | 181.0512<br>(3.3)             |                                                                                                                                                                                      | 163.0403[M-H-H <sub>2</sub> O] <sup>-</sup> ,<br>135.0453[M-H-H <sub>2</sub> O-CO] <sup>-</sup> , 119.0500,<br>72.9939                                                                                                             | 3,4-Dihydroxybenzenepropionic<br>acid                                                                                                         | SM/CT       |
| 22 | C <sub>7</sub> H <sub>6</sub> O <sub>3</sub>                  | 4.71                    | 139.0390<br>(0.8)             | 137.0260<br>(11.8)            | 111.0448[M+H-CO] <sup>+</sup> , 93.0347[M+H-CO-H <sub>2</sub> O] <sup>+</sup> ,<br>65.0415                                                                                           | 109.0302[M-H-CO] <sup>-</sup> , 108.0225, 92.0282,<br>81.0360                                                                                                                                                                      | Protocatechualdehyde <sup>b</sup>                                                                                                             | SM          |
| 23 | C <sub>16</sub> H <sub>18</sub> O <sub>9</sub>                | 4.72                    | 355.1015<br>(-2.5)            | 353.0858<br>(-5.6)            |                                                                                                                                                                                      | 191.0552[Quinic acid-H] <sup>-</sup> , 179.0333,<br>135.0440, 85.0299                                                                                                                                                              | Neochlorogenic<br>acid                                                                                                                        | CT          |
| 24 | C <sub>16</sub> H <sub>20</sub> O <sub>10</sub>               | 5.29                    |                               | 371.0969<br>(-3.8)            |                                                                                                                                                                                      | 325.0910[M-H-H <sub>2</sub> O-CO] <sup>-</sup> , 163.0402,<br>119.0505                                                                                                                                                             | 4-(2-Carboxyethenyl)-2-(3,4-dihydroxyphenyl)-2,3-dihydro-7-hydroxy-3-methylester, [2 $\alpha$ , 3 $\beta$ , 4(E)-3-benzofuran]carboxylic acid | CT          |

| NO | Formula                                         | T <sub>R</sub><br>(min) | [M+H] <sup>+</sup><br>(error) | [M-H] <sup>-</sup><br>(error) | Fragment ions in positive (+) ion mode <sup>a</sup>                                                                                                                                                 | Fragment ions in negative (-) ion mode                                                                                                                                                                                                                                                                                                             | Identification                                       | Attribution |
|----|-------------------------------------------------|-------------------------|-------------------------------|-------------------------------|-----------------------------------------------------------------------------------------------------------------------------------------------------------------------------------------------------|----------------------------------------------------------------------------------------------------------------------------------------------------------------------------------------------------------------------------------------------------------------------------------------------------------------------------------------------------|------------------------------------------------------|-------------|
| 25 | C <sub>18</sub> H <sub>14</sub> O <sub>8</sub>  | 5.98                    | 359.07631<br>(0.4)            | 357.0618<br>(0.6)             | 341.0654[M+H-H <sub>2</sub> O] <sup>+</sup> ,<br>297.0789[M+H-H <sub>2</sub> O-CO <sub>2</sub> ] <sup>+</sup> ,<br>279.0684[M+H-2H <sub>2</sub> O-CO <sub>2</sub> ] <sup>+</sup> ,249.0501,233.0567 | 313.0728[M-H-CO <sub>2</sub> ] <sup>-</sup> ,<br>269.0822[M-H-2CO <sub>2</sub> ] <sup>-</sup> , 253.0517,<br>225.0571[M-H-C <sub>2</sub> H <sub>2</sub> -H <sub>2</sub> O-2CO <sub>2</sub> ] <sup>-</sup> ,                                                                                                                                        | Prolithospermic<br>acid                              | NF          |
| 26 | C <sub>15</sub> H <sub>18</sub> O <sub>9</sub>  | 6.15                    |                               | 341.0860<br>(-5.2)            |                                                                                                                                                                                                     | 179.0347[M-H-Hexoside] <sup>-</sup> ,<br>135.0454[M-H-Hexoside-CO <sub>2</sub> ] <sup>-</sup>                                                                                                                                                                                                                                                      | Caffic<br>acid- <i>O</i> -hexoside                   | SM/CT       |
| 27 | C <sub>15</sub> H <sub>18</sub> O <sub>8</sub>  | 6.26                    |                               | 325.0931<br>(0.7)             |                                                                                                                                                                                                     | 163.0398[M-H-Hexoside] <sup>-</sup> ,<br>119.0508[M-H-Hexoside-CO <sub>2</sub> ] <sup>-</sup>                                                                                                                                                                                                                                                      | Coumaric<br>acid- <i>O</i> -hexoside                 | CT          |
| 28 | C <sub>27</sub> H <sub>32</sub> O <sub>16</sub> | 6.47                    | 613.1766<br>(0.4)             | 611.1596<br>(-3.5)            | 451.1210[M+H-Glc] <sup>+</sup> , 433.1118[M+H-Glc-H <sub>2</sub> O] <sup>+</sup> ,<br>331.1060, 289.0755[M+H-2Glc] <sup>+</sup> , 277.0483,<br>211.0239, 181.0088, 147.0455                         | 521.1310[M-H-C <sub>3</sub> H <sub>6</sub> O <sub>3</sub> ] <sup>-</sup> ,<br>491.1145[M-H-C <sub>4</sub> H <sub>8</sub> O <sub>4</sub> ] <sup>-</sup> ,<br>359.0748[M-H-C <sub>4</sub> H <sub>8</sub> O <sub>4</sub> -C <sub>5</sub> H <sub>10</sub> O <sub>5</sub> ] <sup>-</sup> ,<br>119.0508                                                  | Hydroxysafflor<br>yellow A <sup>b</sup>              | CT          |
| 29 | C <sub>10</sub> H <sub>10</sub> O <sub>4</sub>  | 6.50                    | 195.0646<br>(-3.0)            | 193.0504<br>(-1.0)            | 177.0534[M+H-H <sub>2</sub> O] <sup>+</sup> , 149.0289[M+H-H <sub>2</sub> O-CO] <sup>+</sup> ,<br>135.0375, 117.0310, 89.0380, 77.0399                                                              | 149.0616[M-H-CO <sub>2</sub> ] <sup>-</sup> ,<br>121.0663[M-H-CO <sub>2</sub> -C <sub>2</sub> H <sub>4</sub> ] <sup>-</sup>                                                                                                                                                                                                                        | Ferulic acid                                         | SM          |
| 30 | C <sub>16</sub> H <sub>18</sub> O <sub>9</sub>  | 6.58                    | 355.1019<br>(1.2)             | 353.0880<br>(0.4)             | 163.0387[M+H-Quinic acid] <sup>+</sup> ,<br>145.0283[M+H-Quinic acid-H <sub>2</sub> O] <sup>+</sup> ,<br>117.0331[M+H-Quinic acid-H <sub>2</sub> O-CO] <sup>+</sup>                                 | 191.0553[Quinic acid-H] <sup>-</sup> , 179.0344,<br>173.0449, 135.0444, 111.0455, 93.0341                                                                                                                                                                                                                                                          | Chlorogenic acid                                     | CT          |
| 31 | C <sub>33</sub> H <sub>40</sub> O <sub>22</sub> | 6.63                    | 789.2086<br>(0.2)             | 787.1914<br>(-3.1)            | 627.1561[M+H-Glc] <sup>+</sup> , 465.1032[M+H-2Glc] <sup>+</sup> ,<br>303.0498,                                                                                                                     | 625.1397[M-H-Glc] <sup>-</sup> ,<br>463.0883[M-H-2Glc] <sup>-</sup> , 299.0244                                                                                                                                                                                                                                                                     | 6-Hydroxykaempf<br>erol-tri- <i>O</i> -glucosi<br>de | CT          |
| 32 | C <sub>18</sub> H <sub>26</sub> O <sub>11</sub> | 6.65                    |                               | 417.1399<br>(-0.9)            |                                                                                                                                                                                                     | 209.0795[M-H-Glc-H <sub>2</sub> O-CO] <sup>-</sup> , 194.0578                                                                                                                                                                                                                                                                                      | Syringin                                             | SM/CT       |
| 33 | C <sub>9</sub> H <sub>8</sub> O <sub>4</sub>    | 6.66                    | 181.0497<br>(0.7)             | 179.0354<br>(2.6)             | 163.0383[M+H-H <sub>2</sub> O] <sup>+</sup> , 139.0397,<br>135.0441[M+H-H <sub>2</sub> O-CO] <sup>+</sup> , 111.0451, 93.0348,<br>65.0413                                                           | 135.0448[M-H-CO <sub>2</sub> ] <sup>-</sup> , 134.0369                                                                                                                                                                                                                                                                                             | Caffeic acid <sup>b</sup>                            | SM          |
| 34 | C <sub>17</sub> H <sub>26</sub> O <sub>11</sub> | 6.83                    |                               | 405.1392<br>(-2.4)            |                                                                                                                                                                                                     | 359.1345[M-H-H <sub>2</sub> O-CO] <sup>-</sup> ,<br>197.0815[M-H-H <sub>2</sub> O-CO-Glc] <sup>-</sup> , 153.0898,<br>89.0240                                                                                                                                                                                                                      | Ixoroside                                            | CT          |
| 35 | C <sub>27</sub> H <sub>32</sub> O <sub>16</sub> | 7.07                    | 613.1766<br>(0.4)             | 611.1596<br>(-3.5)            |                                                                                                                                                                                                     | 593.1450[M-H-H <sub>2</sub> O] <sup>-</sup> ,<br>521.1219[M-H-C <sub>3</sub> H <sub>6</sub> O <sub>3</sub> ] <sup>-</sup> ,<br>491.1172[M-H-C <sub>4</sub> H <sub>8</sub> O <sub>4</sub> ] <sup>-</sup> ,<br>359.0748[M-H-C <sub>4</sub> H <sub>8</sub> O <sub>4</sub> -C <sub>5</sub> H <sub>10</sub> O <sub>5</sub> ] <sup>-</sup> ,<br>328.0566 | Hydroxysafflor<br>yellow A isomer                    | CT          |
| 36 | C <sub>27</sub> H <sub>30</sub> O <sub>17</sub> | 7.21                    | 627.1560<br>(0.7)             | 625.1386<br>(-3.9)            | 465.1015[M+H-Glc] <sup>+</sup> ,303.0490[M+H-2Glc] <sup>+</sup>                                                                                                                                     | 463.0802[M-H-Glc] <sup>-</sup> , 287.0500                                                                                                                                                                                                                                                                                                          | Quercetin-di- <i>O</i> -gl<br>ucoside                | CT          |

| NO | Formula                                         | T <sub>R</sub><br>(min) | [M+H] <sup>+</sup><br>(error) | [M-H] <sup>-</sup><br>(error) | Fragment ions in positive (+) ion mode <sup>a</sup>                                                                                                                                                                                       | Fragment ions in negative (-) ion mode                                                                                                                                                                                                                                                       | Identification                                     | Attribution |
|----|-------------------------------------------------|-------------------------|-------------------------------|-------------------------------|-------------------------------------------------------------------------------------------------------------------------------------------------------------------------------------------------------------------------------------------|----------------------------------------------------------------------------------------------------------------------------------------------------------------------------------------------------------------------------------------------------------------------------------------------|----------------------------------------------------|-------------|
| 37 | C <sub>27</sub> H <sub>30</sub> O <sub>17</sub> | 7.45                    | 627.1560<br>(0.7)             | 625.1389<br>(-3.3)            | 465.1008[M+H-Glc] <sup>+</sup> , 303.0488[M+H-2Glc] <sup>+</sup>                                                                                                                                                                          | 463.0881[M-H-Glc] <sup>-</sup> ,<br>301.0343[M-H-2Glc] <sup>-</sup> , 271.0254                                                                                                                                                                                                               | 6-Hydroxykaempferol-di- <i>O</i> -glucoside isomer | CT          |
| 38 | C <sub>16</sub> H <sub>22</sub> O <sub>9</sub>  | 7.54                    |                               | 357.1183<br>(-2.3)            |                                                                                                                                                                                                                                           | 195.0659[M-H-Glc] <sup>-</sup> , 136.0518, 119.0505                                                                                                                                                                                                                                          | Sweroside                                          | CT          |
| 39 | C <sub>27</sub> H <sub>32</sub> O <sub>16</sub> | 7.60                    |                               | 611.1596<br>(-3.5)            |                                                                                                                                                                                                                                           | 521.1283[M-H-C <sub>3</sub> H <sub>6</sub> O <sub>3</sub> ] <sup>-</sup> ,<br>491.1197[M-H-C <sub>4</sub> H <sub>8</sub> O <sub>4</sub> ] <sup>-</sup> , 328.0556                                                                                                                            | Hydroxysafflor yellow A isomer                     | CT          |
| 40 | C <sub>20</sub> H <sub>32</sub> O <sub>10</sub> | 7.78                    |                               | 431.1921<br>(-0.5)            |                                                                                                                                                                                                                                           | 385.1873[M-H-H <sub>2</sub> O-CO] <sup>-</sup> ,<br>223.1336[M-H-H <sub>2</sub> O-CO-Glc] <sup>-</sup> , 161.0451,<br>153.0913                                                                                                                                                               | Roseside                                           | SM/CT       |
| 41 | C <sub>17</sub> H <sub>26</sub> O <sub>11</sub> | 7.95                    |                               | 405.1401<br>(-0.2)            |                                                                                                                                                                                                                                           | 359.1331[M-H-H <sub>2</sub> O-CO] <sup>-</sup>                                                                                                                                                                                                                                               | Morrionside                                        | CT          |
| 42 | C <sub>18</sub> H <sub>14</sub> O <sub>8</sub>  | 8.06                    | 359.0764<br>(0.7)             | 357.0599<br>(-4.7)            | 341.0658[M+H-H <sub>2</sub> O] <sup>+</sup> , 313.0725[M+H-H <sub>2</sub> O-CO] <sup>+</sup> ,<br>295.0601[M+H-2H <sub>2</sub> O-CO] <sup>+</sup> ,<br>267.0623[M+H-2H <sub>2</sub> O-2CO] <sup>+</sup> ,<br>251.0724, 221.0562, 161.0602 | 313.0712[M-H-CO <sub>2</sub> ] <sup>-</sup> ,<br>269.0803[M-H-2CO <sub>2</sub> ] <sup>-</sup> , 203.0327,<br>159.0443, 109.0284                                                                                                                                                              | Prolithospermic acid isomer                        | SM          |
| 43 | C <sub>27</sub> H <sub>24</sub> O <sub>13</sub> | 8.25                    | 557.1259<br>(-5.5)            | 555.1090<br>(-9.8)            |                                                                                                                                                                                                                                           | 511.1191[M-H-CO <sub>2</sub> ] <sup>-</sup> ,<br>493.1144[M-H-CO <sub>2</sub> -H <sub>2</sub> O] <sup>-</sup> ,<br>313.0761[M-H-DS-CO <sub>2</sub> ] <sup>-</sup> ,<br>295.0583[M-H-DS-CO <sub>2</sub> -H <sub>2</sub> O] <sup>-</sup> ,<br>197.0428[DS-H] <sup>-</sup> , 185.0234, 109.0283 | Salvianolic acid K isomer                          | NF          |
| 44 | C <sub>9</sub> H <sub>8</sub> O <sub>3</sub>    | 8.57                    | 165.0547<br>(0.2)             | 163.0405<br>(2.7)             | 147.0446[M+H-H <sub>2</sub> O] <sup>+</sup> , 119.0494[M+H-H <sub>2</sub> O-CO] <sup>+</sup> ,<br>91.0554[M+H-H <sub>2</sub> O-2CO] <sup>+</sup> , 65.0412                                                                                | 119.0498[M-H-CO <sub>2</sub> ] <sup>-</sup> ,<br>93.0349[M-H-CO <sub>2</sub> -C <sub>2</sub> H <sub>2</sub> ] <sup>-</sup> , 65.0415                                                                                                                                                         | p-Coumaric acid <sup>b</sup>                       | CT          |
| 45 | C <sub>27</sub> H <sub>24</sub> O <sub>13</sub> | 8.95                    | 557.1292<br>(0.4)             | 555.1078<br>(-12)             |                                                                                                                                                                                                                                           | 511.1246[M-H-CO <sub>2</sub> ] <sup>-</sup> , 493.11074,<br>295.0605[M-H-DS-H <sub>2</sub> O] <sup>-</sup> , 269.0821,<br>197.0439[DS-H] <sup>-</sup> , 185.0239                                                                                                                             | Salvianolic acid K isomer                          | SM          |
| 46 | C <sub>27</sub> H <sub>30</sub> O <sub>17</sub> | 8.98                    | 627.1559<br>(0.5)             | 625.1375<br>(-5.6)            | 465.1033[M+H-Glc] <sup>+</sup> , 303.0498[M+H-2Glc] <sup>+</sup> ,<br>97.0290                                                                                                                                                             | 463.0860[M-H-Glc] <sup>-</sup> ,<br>301.0355[M-H-2Glc] <sup>-</sup> , 271.0264                                                                                                                                                                                                               | 6-Hydroxykaempferol-di- <i>O</i> -glucoside        | CT          |
| 47 | C <sub>27</sub> H <sub>30</sub> O <sub>16</sub> | 9.24                    | 611.1610<br>(0.6)             | 609.1401<br>(-9.8)            | 449.1107[M+H-Glc] <sup>+</sup> , 287.0561[M+H-2Glc] <sup>+</sup> ,<br>145.0685                                                                                                                                                            | 447.0903[M-H-Glc] <sup>-</sup> , 283.0233, 255.0293                                                                                                                                                                                                                                          | Kaempferol-di- <i>O</i> -glucoside isomer          | CT          |
| 48 | C <sub>27</sub> H <sub>24</sub> O <sub>13</sub> | 9.56                    |                               | 555.1108<br>(-6.5)            |                                                                                                                                                                                                                                           | 511.1260[M-H-CO <sub>2</sub> ] <sup>-</sup> ,<br>493.1132[M-H-CO <sub>2</sub> -H <sub>2</sub> O] <sup>-</sup> ,<br>295.0616[M-H-DS-CO <sub>2</sub> -H <sub>2</sub> O] <sup>-</sup> , 271.0623,<br>197.0435[DS-H] <sup>-</sup> , 185.0241, 109.0300                                           | Salvianolic acid K isomer                          | SM          |

| NO | Formula                                         | T <sub>R</sub><br>(min) | [M+H] <sup>+</sup><br>(error) | [M-H] <sup>-</sup><br>(error) | Fragment ions in positive (+) ion mode <sup>a</sup>                                                                                                                                                                                                                                                                                     | Fragment ions in negative (-) ion mode                                                                                                                                                                                                                                                       | Identification                         | Attribution |
|----|-------------------------------------------------|-------------------------|-------------------------------|-------------------------------|-----------------------------------------------------------------------------------------------------------------------------------------------------------------------------------------------------------------------------------------------------------------------------------------------------------------------------------------|----------------------------------------------------------------------------------------------------------------------------------------------------------------------------------------------------------------------------------------------------------------------------------------------|----------------------------------------|-------------|
| 49 | C <sub>18</sub> H <sub>12</sub> O <sub>7</sub>  | 9.58                    | 341.0659<br>(0.8)             | 339.0478<br>(-9.6)            | 323.0534[M+H-H <sub>2</sub> O] <sup>+</sup> , 295.0592[M+H-H <sub>2</sub> O-CO] <sup>+</sup> ,<br>277.0494[M+H-2H <sub>2</sub> O-CO] <sup>+</sup> ,<br>249.0552[M+H-2H <sub>2</sub> O-2CO] <sup>+</sup> ,<br>221.0571[M+H-2H <sub>2</sub> O-3CO] <sup>+</sup> , 187.0348, 137.0222,<br>131.0493, 109.0283                               | 295.0574[M-H-CO <sub>2</sub> ] <sup>-</sup> , 253.0495, 225.0544                                                                                                                                                                                                                             | Salvianolic acid G<br>isomer           | CT          |
| 50 | C <sub>27</sub> H <sub>24</sub> O <sub>13</sub> | 9.89                    |                               | 555.1108<br>(-6.5)            |                                                                                                                                                                                                                                                                                                                                         | 511.1262[M-H-CO <sub>2</sub> ] <sup>-</sup> ,<br>493.1119[M-H-CO <sub>2</sub> -H <sub>2</sub> O] <sup>-</sup> ,<br>313.0701[M-H-DS-CO <sub>2</sub> ] <sup>-</sup> ,<br>295.0610[M-H-DS-CO <sub>2</sub> -H <sub>2</sub> O] <sup>-</sup> ,<br>197.0438[DS-H] <sup>-</sup> , 185.0240, 109.0289 | Salvianolic acid K                     | SM          |
| 51 | C <sub>27</sub> H <sub>30</sub> O <sub>16</sub> | 10.02                   | 611.1612<br>(0.9)             | 609.1421<br>(-6.5)            | 449.0963[M+H-Glc] <sup>+</sup> , 287.0552[M+H-2Glc] <sup>+</sup>                                                                                                                                                                                                                                                                        | 429.0828[M-H-Glc-H <sub>2</sub> O] <sup>-</sup> ,<br>285.0411[M-H-2Glc] <sup>-</sup> , 255.0288, 227.0331                                                                                                                                                                                    | Kaempferol-di- <i>O</i> -<br>glucoside | CT          |
| 52 | C <sub>27</sub> H <sub>22</sub> O <sub>12</sub> | 10.25                   | 539.1185<br>(0.1)             | 537.1005<br>(-6.3)            | 521.1066[M+H-H <sub>2</sub> O] <sup>+</sup> , 323.0549[M+H-H <sub>2</sub> O-DS] <sup>+</sup> ,<br>297.0759[M+H-H <sub>2</sub> O-DS-CO] <sup>+</sup> ,<br>279.0648[M+H-2H <sub>2</sub> O-DS-CO] <sup>+</sup> ,<br>233.0586[M+H-3H <sub>2</sub> O-DS-2CO] <sup>+</sup> , 139.0385                                                         | 493.1151[M-H-CO <sub>2</sub> ] <sup>-</sup> ,<br>295.0612[M-H-CO <sub>2</sub> -DS] <sup>-</sup> , 185.0245,<br>109.0301                                                                                                                                                                      | Salvianolic acid H                     | SM          |
| 53 | C <sub>27</sub> H <sub>22</sub> O <sub>12</sub> | 10.60                   | 539.1185<br>(0.1)             | 537.1005<br>(-6.3)            | 521.1073[M+H-H <sub>2</sub> O] <sup>+</sup> , 323.0551[M+H-H <sub>2</sub> O-DS] <sup>+</sup> ,<br>297.0760[M+H-H <sub>2</sub> O-DS-CO] <sup>+</sup> ,<br>279.0650[M+H-2H <sub>2</sub> O-DS-CO] <sup>+</sup> ,<br>261.0540[M+H-3H <sub>2</sub> O-DS-CO] <sup>+</sup> ,<br>233.0597[M+H-3H <sub>2</sub> O-DS-2CO] <sup>+</sup> , 139.0387 | 439.1145[M-H-CO <sub>2</sub> ] <sup>-</sup> ,<br>295.0608[M-H-CO <sub>2</sub> -DS] <sup>-</sup> , 185.0243,<br>109.0298                                                                                                                                                                      | Salvianolic acid I                     | NF          |
| 54 | C <sub>24</sub> H <sub>26</sub> O <sub>13</sub> | 10.82                   | 523.1426<br>(-3.9)            | 521.1301<br>(0.1)             | 361.0929[M+H-Glc] <sup>+</sup> , 163.0383[M+H-Glc-DS] <sup>+</sup> ,<br>145.0273[M+H-Glc-DS-H <sub>2</sub> O] <sup>+</sup> , 139.0394                                                                                                                                                                                                   | 359.0779[M-H-Glc] <sup>-</sup> ,<br>323.0777[M-H-Glc-2H <sub>2</sub> O] <sup>-</sup> ,<br>179.0349[M-H-Glc-CA] <sup>-</sup> ,<br>161.0243[M-H-Glc-DS] <sup>-</sup> , 135.0448                                                                                                                | Salviaflaside                          | SM          |
| 55 | C <sub>21</sub> H <sub>22</sub> O <sub>11</sub> | 10.85                   | 451.1237<br>(0.4)             | 449.1020<br>(-5.4)            | 289.0712[M+H-Glc] <sup>+</sup> ,<br>169.0121[M+H-Glc-C <sub>4</sub> H <sub>8</sub> O <sub>4</sub> ] <sup>+</sup> , 147.0405, 85.0300                                                                                                                                                                                                    | 287.0550[M-H-Glc] <sup>-</sup> , 181.0146,<br>165.9903, 153.0181                                                                                                                                                                                                                             | Isocarthamin                           | CT          |
| 56 | C <sub>20</sub> H <sub>18</sub> O <sub>10</sub> | 11.30                   | 419.0975<br>(0.6)             | 417.0809<br>(-4.3)            | 401.0780[M+H-H <sub>2</sub> O] <sup>+</sup> , 221.0454[M+H-DS] <sup>+</sup> ,<br>181.0475, 177.0559[M+H-DS-CO <sub>2</sub> ] <sup>+</sup> , 147.0440,<br>131.0493                                                                                                                                                                       | 373.0924[M-H-CO <sub>2</sub> ] <sup>-</sup> , 197.0465,<br>193.0521[M-H-CO <sub>2</sub> -CA] <sup>-</sup> , 179.0364,<br>175.0415[M-H-CO <sub>2</sub> -DS] <sup>-</sup> , 157.0314,<br>135.0476, 129.0372, 123.0477, 72.9971                                                                 | Salvianolic acid<br>D <sup>b</sup>     | SM          |
| 57 | C <sub>27</sub> H <sub>30</sub> O <sub>15</sub> | 11.39                   | 595.1663<br>(0.9)             | 593.1433<br>(-3.3)            | 499.1064, 433.1113[M+H-Glc] <sup>+</sup> ,<br>287.0557[M+H-Glc-Rha] <sup>+</sup> , 255.0837, 129.0554                                                                                                                                                                                                                                   | 327.0538, 285.0410[M-H-Glc-Rha] <sup>-</sup> ,<br>284.0317, 255.0282, 227.0363                                                                                                                                                                                                               | Kaempferol- <i>O</i> -rut<br>inoside   | CT          |

| NO | Formula                                          | T <sub>R</sub><br>(min) | [M+H] <sup>+</sup><br>(error) | [M-H] <sup>-</sup><br>(error) | Fragment ions in positive (+) ion mode <sup>a</sup>                                                                                                                                                                                      | Fragment ions in negative (-) ion mode                                                                                                                                                                                                                                  | Identification                     | Attribution |
|----|--------------------------------------------------|-------------------------|-------------------------------|-------------------------------|------------------------------------------------------------------------------------------------------------------------------------------------------------------------------------------------------------------------------------------|-------------------------------------------------------------------------------------------------------------------------------------------------------------------------------------------------------------------------------------------------------------------------|------------------------------------|-------------|
| 58 | C <sub>18</sub> H <sub>12</sub> O <sub>7</sub>   | 11.51                   | 341.0658<br>(0.7)             | 339.0496<br>(-4.1)            | 323.0580[M+H-H <sub>2</sub> O] <sup>+</sup> , 297.0858[M+H-CO <sub>2</sub> ] <sup>+</sup> ,<br>281.0435, 203.0348, 187.0372                                                                                                              | 321.0396[M-H-H <sub>2</sub> O] <sup>-</sup> ,<br>295.0608[M-H-CO <sub>2</sub> ] <sup>-</sup> ,<br>293.0465[M-H-H <sub>2</sub> O-CO] <sup>-</sup> , 279.0306,<br>277.0518, 251.0335, 223.0397, 195.0480                                                                  | Salvianolic acid G                 | SM          |
| 59 | C <sub>28</sub> H <sub>24</sub> O <sub>12</sub>  | 11.78                   | 553.1337<br>(-0.6)            | 551.1152<br>(-7.7)            | 293.0722, 263.1032, 181.0545                                                                                                                                                                                                             | 507.1254[M-H-CO <sub>2</sub> ] <sup>-</sup> ,<br>327.0882[M-H-CO <sub>2</sub> -CA] <sup>-</sup> , 309.0760,<br>294.0530, 277.0518, 197.0453[DS-H] <sup>-</sup> ,<br>185.0242, 179.0349, 135.0466                                                                        | Monomethyl<br>lithospermate        | NF          |
| 60 | C <sub>27</sub> H <sub>29</sub> NO <sub>13</sub> | 11.97                   | 576.1713<br>(0.2)             | 574.1481<br>(-4.9)            | 558.1550[M+H-H <sub>2</sub> O] <sup>+</sup> , 414.1146[M+H-Glc] <sup>+</sup> ,<br>354.0842, 294.0587[M+H-Glc-C <sub>4</sub> H <sub>8</sub> O <sub>4</sub> ] <sup>+</sup> , 248.0565,<br>246.0338, 244.0248, 234.0412, 178.0519, 147.0438 | 466.1072, 454.0925[M-H-C <sub>4</sub> H <sub>8</sub> O <sub>4</sub> ] <sup>-</sup> ,<br>364.0796[M-H-C <sub>3</sub> H <sub>6</sub> O <sub>3</sub> -C <sub>4</sub> H <sub>8</sub> O <sub>4</sub> ] <sup>-</sup> ,<br>244.0229, 216.0309                                  | Cartormin                          | CT          |
| 61 | C <sub>18</sub> H <sub>16</sub> O <sub>8</sub>   | 12.15                   |                               | 359.0761<br>(-3.1)            |                                                                                                                                                                                                                                          | 197.0463[DS-H] <sup>-</sup> , 179.0356[M-H-CA] <sup>-</sup> ,<br>161.0251[M-H-CA-H <sub>2</sub> O] <sup>-</sup> , 135.0465,<br>123.0467, 72.9962                                                                                                                        | Rosmarinic acid <sup>b</sup>       | SM          |
| 62 | C <sub>27</sub> H <sub>22</sub> O <sub>12</sub>  | 12.49                   | 539.1184<br>(0.4)             | 537.1046<br>(1.5)             | 521.0935[M+H-H <sub>2</sub> O] <sup>+</sup> , 341.0665[M+H-DS] <sup>+</sup> ,<br>323.0560[M+H-H <sub>2</sub> O-DS] <sup>+</sup> ,<br>295.0593[M+H-H <sub>2</sub> O-DS-CO] <sup>+</sup> ,<br>279.0586, 249.0572, 179.0346, 135.0390       | 493.1098[M-H-CO <sub>2</sub> ] <sup>-</sup> ,<br>313.0697[M-H-CO <sub>2</sub> -CA] <sup>-</sup> ,<br>295.0602[M-H-CO <sub>2</sub> -DS] <sup>-</sup> , 185.0250,<br>109.0310                                                                                             | Lithospermic<br>acid <sup>b</sup>  | SM          |
| 63 | C <sub>18</sub> H <sub>16</sub> O <sub>5</sub>   | 12.81                   | 313.1078<br>(2.3)             |                               | 295.0948[M+H-H <sub>2</sub> O] <sup>+</sup> , 277.0862[M+H-2H <sub>2</sub> O] <sup>+</sup> ,<br>267.0650[M+H-H <sub>2</sub> O-CO] <sup>+</sup> , 225.0525, 197.0592,<br>169.0623, 153.0680                                               |                                                                                                                                                                                                                                                                         | Tanshindiol A                      | SM          |
| 64 | C <sub>37</sub> H <sub>32</sub> O <sub>16</sub>  | 13.21                   |                               | 731.1618<br>(0.0)             |                                                                                                                                                                                                                                          | 551.1216[M-H-CA] <sup>-</sup> , 533.1105[M-H-DS] <sup>-</sup> ,<br>353.0654[M-H-DS-CA] <sup>-</sup> ,<br>335.0559[M-H-2DS] <sup>-</sup> , 309.0719                                                                                                                      | 9''-Methyl<br>lithospermate B      | NF          |
| 65 | C <sub>36</sub> H <sub>30</sub> O <sub>16</sub>  | 13.46                   | 719.1608<br>(0.4)             | 717.1482<br>(2.9)             | 521.1042[M+H-DS] <sup>+</sup> , 341.0661[M+H-DS-CA] <sup>+</sup> ,<br>323.0540[M+H-2DS] <sup>+</sup> , 295.0595[M+H-2DS-CO] <sup>+</sup> ,<br>181.0490[CA+H] <sup>+</sup>                                                                | 519.0887[M-H-DS] <sup>-</sup> ,<br>339.0498[M-H-DS-CA] <sup>-</sup> ,<br>321.0299[M-H-2DS] <sup>-</sup>                                                                                                                                                                 | Salvianolic acid E                 | SM/CT       |
| 66 | C <sub>36</sub> H <sub>30</sub> O <sub>16</sub>  | 13.89                   | 719.1581<br>(-3.6)            | 717.1485<br>(3.3)             |                                                                                                                                                                                                                                          | 519.0932[M-H-DS] <sup>-</sup> ,<br>339.0510[M-H-DS-CA] <sup>-</sup> ,<br>321.0409[M-H-2DS] <sup>-</sup> , 295.0596                                                                                                                                                      | Salvianolic acid<br>B <sup>b</sup> | SM          |
| 67 | C <sub>29</sub> H <sub>26</sub> O <sub>12</sub>  | 13.95                   |                               | 565.1352<br>(0.1)             |                                                                                                                                                                                                                                          | 519.0909[M-H-CH <sub>3</sub> CH <sub>2</sub> OH] <sup>-</sup> ,<br>367.0823[M-H-DS] <sup>-</sup> ,<br>321.0417[M-H-DS-CH <sub>3</sub> CH <sub>2</sub> OH] <sup>-</sup> ,<br>293.0431[M-H-DS-CH <sub>3</sub> CH <sub>2</sub> OH-CO] <sup>-</sup> ,<br>245.0453, 109.0286 | Ethyl<br>lithospermate             | NF          |

| NO | Formula                                         | T <sub>R</sub><br>(min) | [M+H] <sup>+</sup><br>(error) | [M-H] <sup>-</sup><br>(error) | Fragment ions in positive (+) ion mode <sup>a</sup>                                                                                                                                                                                  | Fragment ions in negative (-) ion mode                                                                                                                                                                                                                                                      | Identification                                      | Attribution |
|----|-------------------------------------------------|-------------------------|-------------------------------|-------------------------------|--------------------------------------------------------------------------------------------------------------------------------------------------------------------------------------------------------------------------------------|---------------------------------------------------------------------------------------------------------------------------------------------------------------------------------------------------------------------------------------------------------------------------------------------|-----------------------------------------------------|-------------|
| 68 | C <sub>36</sub> H <sub>30</sub> O <sub>16</sub> | 14.11                   | 719.1587<br>(-2.7)            | 717.1490<br>(4.1)             | 521.1069[M+H-DS] <sup>+</sup> ,<br>323.0549[M+H-2DS] <sup>+</sup> , 295.0607[M+H-2DS-CO] <sup>+</sup> ,<br>181.0491[CA+H] <sup>+</sup>                                                                                               | 519.0940[M-H-DS] <sup>-</sup> ,<br>339.0520[M-H-DS-CA] <sup>-</sup> ,<br>321.0410[M-H-2DS] <sup>-</sup> , 295.0619, 185.0246                                                                                                                                                                | Salvianolic acid L                                  | SM          |
| 69 | C <sub>19</sub> H <sub>18</sub> O <sub>8</sub>  | 14.35                   |                               | 373.0923<br>(-1.6)            |                                                                                                                                                                                                                                      | 179.0336[CA-H] <sup>-</sup> , 135.0446                                                                                                                                                                                                                                                      | Romarinic acid<br>methyl ester                      | SM          |
| 70 | C <sub>26</sub> H <sub>22</sub> O <sub>10</sub> | 14.45                   |                               | 493.1145<br>(0.9)             |                                                                                                                                                                                                                                      | 313.0704[M-H-CA] <sup>-</sup> , 295.0594[M-H-DS] <sup>-</sup> ,<br>185.0250[M-H-DS-C <sub>6</sub> H <sub>6</sub> O <sub>2</sub> ] <sup>-</sup> ,<br>159.0455[M-H-DS-C <sub>6</sub> H <sub>6</sub> O <sub>2</sub> -C <sub>2</sub> H <sub>2</sub> ] <sup>-</sup> ,<br>135.0457, 109.0306      | Salvianolic acid<br>A <sup>b</sup>                  | SM          |
| 71 | C <sub>18</sub> H <sub>16</sub> O <sub>5</sub>  | 14.66                   | 313.1071<br>(2.3)             |                               | 295.0944[M+H-H <sub>2</sub> O] <sup>+</sup> , 277.0874[M+H-2H <sub>2</sub> O] <sup>+</sup> ,<br>267.0979[M+H-H <sub>2</sub> O-CO] <sup>+</sup> ,<br>249.0904[M+H-2H <sub>2</sub> O-CO] <sup>+</sup> , 169.0647, 151.1099,<br>95.0464 |                                                                                                                                                                                                                                                                                             | Tanshindiol B                                       | SM          |
| 72 | C <sub>37</sub> H <sub>32</sub> O <sub>16</sub> | 14.79                   |                               | 731.1628<br>(1.4)             |                                                                                                                                                                                                                                      | 533.1121[M-H-DS] <sup>-</sup> ,<br>353.0656[M-H-DS-CA] <sup>-</sup> ,<br>335.0561[M-H-2DS] <sup>-</sup> , 309.0742                                                                                                                                                                          | 9 <sup>n</sup> -Methyl<br>lithospermate<br>B/isomer | SM          |
| 73 | C <sub>26</sub> H <sub>22</sub> O <sub>10</sub> | 14.96                   | 495.1279<br>(-1.4)            | 493.1144<br>(0.7)             | 269.0822[M+H-DS-CO] <sup>+</sup> ,<br>251.0695[M+H-DS-CO-H <sub>2</sub> O] <sup>+</sup> ,<br>223.0742[M+H-DS-2CO-H <sub>2</sub> O] <sup>+</sup> , 205.0655,<br>181.0448, 143.0461, 139.0379, 135.0457, 111.0401                      | 313.0704[M-H-CA] <sup>-</sup> , 295.0613[M-H-DS] <sup>-</sup> ,<br>185.0240[M-H-DS-C <sub>6</sub> H <sub>6</sub> O <sub>2</sub> ] <sup>-</sup> ,<br>159.0448[M-H-DS-C <sub>6</sub> H <sub>6</sub> O <sub>2</sub> -C <sub>2</sub> H <sub>2</sub> ] <sup>-</sup> ,<br>109.0297                | Salvianolic acid A<br>isomer                        | NF          |
| 74 | C <sub>26</sub> H <sub>20</sub> O <sub>10</sub> | 15.46                   | 493.1129<br>(0.6)             | 491.0989<br>(1.0)             | 313.0688[M+H-CA] <sup>+</sup> , 295.0604[M+H-DS] <sup>+</sup> ,<br>267.0696, 135.0178                                                                                                                                                | 311.0560[M-H-CA] <sup>-</sup> , 293.0454[M-H-DS] <sup>-</sup> ,<br>265.0505[M-H-DS-CO] <sup>-</sup> ,<br>249.0562[M-H-DS-CO <sub>2</sub> ] <sup>-</sup> ,<br>197.0444[DS-H] <sup>-</sup> , 135.0457                                                                                         | Salvianolic acid C<br>isomer                        | SM          |
| 75 | C <sub>29</sub> H <sub>26</sub> O <sub>12</sub> | 15.80                   |                               | 565.1352<br>(-0.7)            |                                                                                                                                                                                                                                      | 519.0821[M-H-CH <sub>3</sub> CH <sub>2</sub> OH] <sup>-</sup> ,<br>367.0766[M-H-DS] <sup>-</sup> ,<br>321.0389[M-H-DS-CH <sub>3</sub> CH <sub>2</sub> OH] <sup>-</sup> ,<br>293.0477[M-H-DS-CH <sub>3</sub> CH <sub>2</sub> OH-CO] <sup>-</sup> ,<br>245.0424, 197.0503, 135.0460, 109.0313 | Ethyl<br>lithospermate<br>isomer                    | NF          |
| 76 | C <sub>26</sub> H <sub>20</sub> O <sub>10</sub> | 16.75                   |                               | 491.0986<br>(0.5)             |                                                                                                                                                                                                                                      | 311.0529[M-H-CA] <sup>-</sup> , 293.0433[M-H-DS] <sup>-</sup> ,<br>265.0467[M-H-DS-CO] <sup>-</sup> ,<br>249.0433[M-H-DS-CO <sub>2</sub> ] <sup>-</sup> ,<br>247.0391[M-H-DS-CO-H <sub>2</sub> O] <sup>-</sup> , 135.0447                                                                   | Salvianolic acid C                                  | SM          |



| NO | Formula                                        | T <sub>R</sub><br>(min) | [M+H] <sup>+</sup><br>(error) | [M-H] <sup>-</sup><br>(error) | Fragment ions in positive (+) ion mode <sup>a</sup>                                                                                                                                                                                                                                                                                                                            | Fragment ions in negative (-) ion mode | Identification                                                                                       | Attribution |
|----|------------------------------------------------|-------------------------|-------------------------------|-------------------------------|--------------------------------------------------------------------------------------------------------------------------------------------------------------------------------------------------------------------------------------------------------------------------------------------------------------------------------------------------------------------------------|----------------------------------------|------------------------------------------------------------------------------------------------------|-------------|
| 77 | C <sub>18</sub> H <sub>18</sub> O <sub>4</sub> | 17.49                   | 299.1282<br>(1.4)             |                               | 281.1169[M+H-H <sub>2</sub> O] <sup>+</sup> , 263.1067[M+H-2H <sub>2</sub> O] <sup>+</sup> ,<br>251.1059, 235.1104[M+H-2H <sub>2</sub> O-CO] <sup>+</sup> , 192.0918,<br>165.0687                                                                                                                                                                                              |                                        | Phenanthro[1,2-b]<br>furan-10,11-dione<br>,<br>1,2,6,7,8,9-hexah<br>ydro-6-hydroxy-1<br>,6-dimethyl- | SM          |
| 78 | C <sub>19</sub> H <sub>20</sub> O <sub>4</sub> | 17.91                   | 313.1434<br>(0.2)             |                               | 295.1247[M+H-H <sub>2</sub> O] <sup>+</sup> , 269.1547,<br>267.1358[M+H-H <sub>2</sub> O-CO] <sup>+</sup> , 253.0864, 249.1241,<br>225.2208[M+H-H <sub>2</sub> O-CO-C <sub>3</sub> H <sub>6</sub> ] <sup>+</sup> , 199.0749,<br>197.1349[M+H-H <sub>2</sub> O-2CO-C <sub>3</sub> H <sub>6</sub> ] <sup>+</sup> , 171.0818,<br>169.1022, 155.1316, 141.0675, 128.0635, 115.1976 |                                        | 17-Hydroxycrypt<br>otanshinone                                                                       | SM          |
| 79 | C <sub>19</sub> H <sub>20</sub> O <sub>3</sub> | 17.99                   | 297.1485<br>(1.0)             |                               | 253.1579, 251.14238[M+H-H <sub>2</sub> O-CO] <sup>+</sup> ,<br>237.0906, 211.1104, 181.1008, 165.0694, 155.0847,<br>141.0701, 128.0617                                                                                                                                                                                                                                         |                                        | Unknown<br>tanshinone                                                                                | SM          |
| 80 | C <sub>19</sub> H <sub>20</sub> O <sub>4</sub> | 18.42                   | 313.1437<br>(0.8)             |                               | 295.1354[M+H-H <sub>2</sub> O] <sup>+</sup> , 277.1546,<br>267.1346[M+H-H <sub>2</sub> O-CO] <sup>+</sup> , 249.1302,<br>225.2198[M+H-H <sub>2</sub> O-CO-C <sub>3</sub> H <sub>6</sub> ] <sup>+</sup> ,<br>197.1333[M+H-H <sub>2</sub> O-2CO-C <sub>3</sub> H <sub>6</sub> ] <sup>+</sup>                                                                                     |                                        | Hydroxycryptotan<br>shinone isomer                                                                   | SM          |
| 81 | C <sub>19</sub> H <sub>20</sub> O <sub>4</sub> | 20.27                   | 313.1435<br>(1.3)             |                               | 295.1317[M+H-H <sub>2</sub> O] <sup>+</sup> , 277.1532[M+H-2H <sub>2</sub> O] <sup>+</sup> ,<br>249.1198[M+H-2H <sub>2</sub> O-CO] <sup>+</sup> , 225.1040                                                                                                                                                                                                                     |                                        | 3-Hydroxycryptot<br>anshinone                                                                        | SM          |
| 82 | C <sub>19</sub> H <sub>20</sub> O <sub>3</sub> | 23.09                   | 297.1487<br>(0.5)             |                               | 269.1538[M+H-CO] <sup>+</sup> , 253.1577,<br>251.1426[M+H-H <sub>2</sub> O-CO] <sup>+</sup> , 237.0904,<br>223.1109[M+H-H <sub>2</sub> O-2CO] <sup>+</sup> , 211.1130, 181.1000,<br>165.0690, 141.0692, 128.0618                                                                                                                                                               |                                        | Unknown<br>tanshinone                                                                                | SM          |

<sup>a</sup> DS: Danshensu; CA: Caffeic acid; Glc: Glucoside; SM: Salvia Miltiorrhiza; CT: Carthamus tinctorius; NF: newly formed compounds.

<sup>b</sup> Confirmation in comparison with authentic standards.

**Supplementary Table S2. Weights and ratio of SM and CT herbs in the nine DHI prescription modified samples under uniform design.** SM, *Salvia Miltiorrhiza*; CT, *Carthamus tinctorius*. Sample S3 was the original formula.

| No. | SM (g) | CT (g) | SM:CT  |
|-----|--------|--------|--------|
| S1  | 400    | 0      | 100: 0 |
| S2  | 350    | 50     | 7: 1   |
| S3  | 300    | 100    | 3: 1   |
| S4  | 250    | 150    | 5: 3   |
| S5  | 200    | 200    | 1: 1   |
| S6  | 150    | 250    | 3: 5   |
| S7  | 100    | 300    | 1: 3   |
| S8  | 50     | 350    | 1: 7   |
| S9  | 0      | 400    | 0: 100 |

**Supplementary Table S3. Dimensionless data of peak areas of 13 identified components in nine DHI modified samples.** S1-S9 represented nine DHI samples. P1-P13 represented 13 identified components in DHI and were regarded as the independent ingredient variables. P1-P13 were processed to be dimensionless by the equalization method for the calculation.

| No. | P1   | P2   | P3   | P4   | P5   | P6   | P7   | P8   | P9   | P10  | P11  | P12  | P13  |
|-----|------|------|------|------|------|------|------|------|------|------|------|------|------|
| S1  | 0    | 1.57 | 1.93 | 0    | 0    | 2.08 | 2.07 | 2.12 | 1.52 | 1.97 | 1.34 | 1.41 | 0.58 |
| S2  | 0    | 1.73 | 1.77 | 0    | 0    | 2.31 | 2.22 | 2.34 | 0.95 | 0.8  | 1.4  | 1.22 | 0.38 |
| S3  | 0.37 | 1.98 | 2.44 | 1.1  | 1.5  | 2.01 | 2.35 | 2.28 | 2.3  | 1.94 | 2.82 | 2.46 | 3.88 |
| S4  | 1.54 | 1.41 | 1.4  | 1.6  | 1.48 | 0.91 | 0.85 | 0.91 | 2.26 | 2.26 | 1.8  | 2.39 | 3.08 |
| S5  | 2.72 | 1.21 | 0.47 | 0.39 | 0.18 | 0.55 | 0.45 | 0.47 | 0.45 | 0.45 | 0.6  | 0.41 | 0.21 |
| S6  | 1.11 | 0.46 | 0.27 | 1.66 | 0.56 | 0.61 | 0.33 | 0.38 | 0.4  | 0.73 | 0.32 | 0.47 | 0.28 |
| S7  | 0.58 | 0.47 | 0.47 | 1.03 | 1.59 | 0.35 | 0.42 | 0.32 | 0.92 | 0.66 | 0.56 | 0.47 | 0.46 |
| S8  | 1.06 | 0.17 | 0.25 | 1.05 | 1.65 | 0.18 | 0.29 | 0.17 | 0.2  | 0.21 | 0.16 | 0.19 | 0.14 |
| S9  | 1.62 | 0    | 0    | 2.17 | 2.05 | 0    | 0    | 0    | 0    | 0    | 0    | 0    | 0    |

**Supplementary Table S4. Dimensionless data of pharmacological indexes of nine DHI modified samples.** S1-S9 represented the nine DHI modified samples. Effect values of switched parameters were processed to be dimensionless by an equalization method for the calculation.

| No. | WBV5   | WBV50  | WBV200 | PV     | MPAR   | PT     | APTT   | EAI    | ERI    | RCEI   |
|-----|--------|--------|--------|--------|--------|--------|--------|--------|--------|--------|
| S1  | 1.0408 | 1.0208 | 1.0135 | 0.9595 | 1.0432 | 1.0040 | 0.9361 | 1.0240 | 1.0491 | 1.0042 |
| S2  | 1.0653 | 1.0453 | 1.0317 | 0.9912 | 1.0276 | 1.0024 | 0.9507 | 1.0452 | 1.0611 | 1.0925 |
| S3  | 1.0478 | 1.0690 | 1.0481 | 0.9912 | 0.9658 | 1.0114 | 0.9945 | 1.0240 | 1.0491 | 1.0313 |
| S4  | 1.0065 | 1.0140 | 1.0271 | 0.9995 | 0.8642 | 0.9998 | 0.9714 | 1.0310 | 1.0759 | 1.0228 |
| S5  | 1.0455 | 1.0242 | 1.0271 | 1.0079 | 0.8286 | 0.9934 | 1.0612 | 1.0137 | 0.9994 | 0.9596 |
| S6  | 0.9249 | 0.9613 | 0.9708 | 0.9995 | 1.1950 | 0.9838 | 1.0298 | 0.9266 | 0.9444 | 0.9432 |
| S7  | 1.0241 | 1.0123 | 0.9917 | 0.9831 | 0.8920 | 1.0072 | 0.9523 | 1.0171 | 0.9701 | 0.9962 |
| S8  | 0.9603 | 0.9420 | 0.9508 | 1.0251 | 0.9422 | 0.9934 | 1.0390 | 0.9744 | 0.9219 | 0.9962 |
| S9  | 0.8846 | 0.9111 | 0.9392 | 1.0429 | 0.9333 | 0.9955 | 1.0651 | 0.944  | 0.9146 | 0.9541 |

**Supplementary Table S5. The rotating component matrix results between ten pharmacological indexes and five factors.** F1-F5 represented Factor 1-5 respectively. Variance contribution means how much the corresponding factor reflects the original data. The larger the absolute value, the higher the relevance between indexes and factors.

| Indexes | F1     | F2     | F3     | F4     | F5     |
|---------|--------|--------|--------|--------|--------|
| WBV200  | 0.950  | 0.264  | 0.048  | 0.075  | 0.095  |
| WBV50   | 0.904  | 0.345  | 0.093  | 0.168  | -0.093 |
| WBV5    | 0.842  | 0.369  | 0.016  | 0.301  | -0.106 |
| ERI     | 0.775  | 0.390  | 0.233  | 0.196  | 0.362  |
| EAI     | 0.717  | 0.541  | -0.124 | 0.363  | 0.079  |
| RCEI    | 0.373  | 0.867  | 0.012  | 0.110  | 0.225  |
| PT      | 0.413  | 0.840  | 0.010  | 0.200  | -0.217 |
| MPAR    | -0.024 | -0.026 | 0.989  | 0.092  | 0.030  |
| PV      | -0.560 | -0.156 | -0.578 | -0.562 | 0.092  |
| APTT    | -0.307 | -0.553 | -0.392 | -0.651 | -0.100 |

**Supplementary Table S6. Linear equation, R<sup>2</sup>, and range of eight components for quantitative determination.**

| Compound                | Regression equation | R <sup>2</sup> | Range (µg/mL) |
|-------------------------|---------------------|----------------|---------------|
| Danshensu               | y=0.0147x+0.0648    | 1.0000         | 26.12-783.6   |
| Hydroxysafflor yellow A | y=0.0404x+0.0430    | 0.9995         | 4.35-130.4    |
| p-Coumaric acid         | y=0.314x+0.0082     | 1.0000         | 1.31-39.40    |
| Salvianolic acid D      | y=0.0591x-0.0150    | 1.0000         | 14.4-432.2    |
| Rosmarinic acid         | y=0.0715x+0.0055    | 1.0000         | 7.57-227.1    |
| Lithospermic acid       | y=0.0136x+0.0360    | 1.0000         | 3.30-98.98    |
| Salvianolic acid B      | y=0.0259x-0.0818    | 0.9999         | 24.05-721.5   |
| Salvianolic acid A      | y=0.0325x+0.0850    | 0.9999         | 24.46-366.9   |

**Supplementary Table S7. Contents of 8 components in DHI and CBC.**

| No. | Compound name           | DHI Peak          | DHI                  | CBC peak          | CBC                  |
|-----|-------------------------|-------------------|----------------------|-------------------|----------------------|
|     |                         | area<br>(mAU*min) | content<br>(mg/10mL) | area<br>(mAU*min) | content<br>(mg/10mL) |
| 2   | Danshensu               | 8.4130            | 5.67                 | 8.2528            | 5.57                 |
| 4   | Hydroxysafflor yellow A | 0.5282            | 0.12                 | 0.4883            | 0.11                 |
| 5   | p-Coumaric acid         | 2.5271            | 0.08                 | 2.6520            | 0.08                 |
| 8   | Salvianolic acid D      | 2.8816            | 0.49                 | 2.7463            | 0.47                 |
| 10  | Rosmarinic acid         | 5.5137            | 0.77                 | 5.3918            | 0.75                 |
| 11  | Lithospermic acid       | 0.7157            | 0.50                 | 0.7094            | 0.50                 |
| 12  | Salvianolic acid B      | 5.0020            | 1.96                 | 5.0701            | 1.99                 |
| 13  | Salvianolic acid A      | 2.9743            | 0.89                 | 2.9724            | 0.89                 |

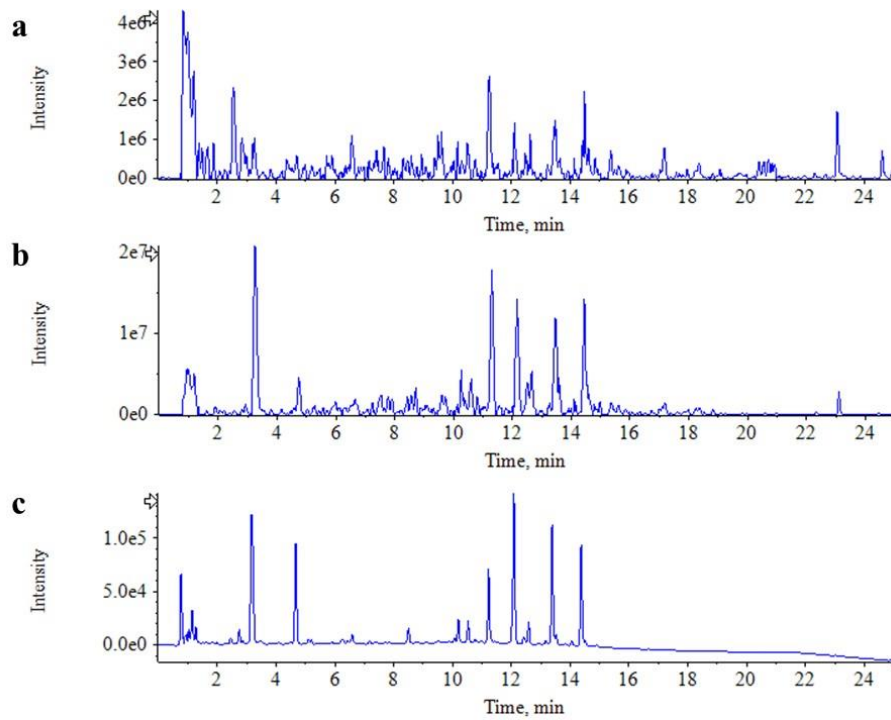

**Supplementary Figure S1. Representative total ion chromatogram (TIC) of DHI in positive ion mode (a), negative ion mode (b) and PDA (c) by UFLC-PDA-Triple TOF-MS/MS.**

**Supplementary Video S1. The blood flow of cerebral microarterioles thirty minutes after irradiation in Control group.** In control group, the blood flow velocity of the blocked vessel (the lower vessel in the video) reduced significantly and stagnated at 30 min.

**Supplementary Video S2. The blood flow of cerebral microarterioles thirty minutes after irradiation in DHI group.** In DHI group, the blood flow maintain at a relevant faster velocity. The clots were hardly to develop even 30 min after irradiation.
